# Supplementary material for: Lumateperone Interact with S-Protein of Ebola Virus and TIM-1 of Human Cell Membrane: Insights from Computational Studies
Source: MDPI journal article supplement (doi:10.3390/app12178820), 2022-09-02
Supplement: s1 [file s1]

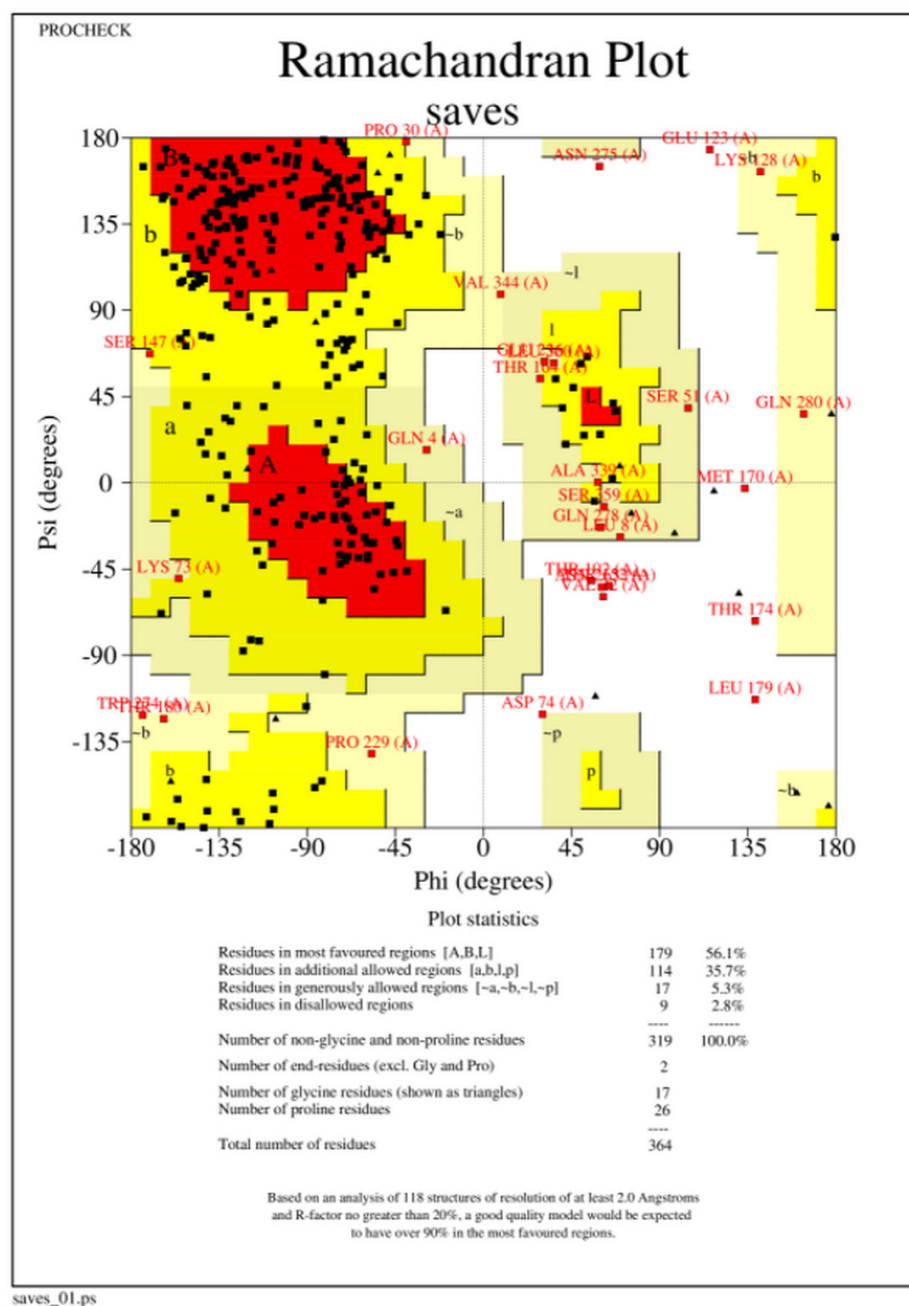

**Figure S2.** 3D structure validation of TIM-1 protein through Ramachandran plot.

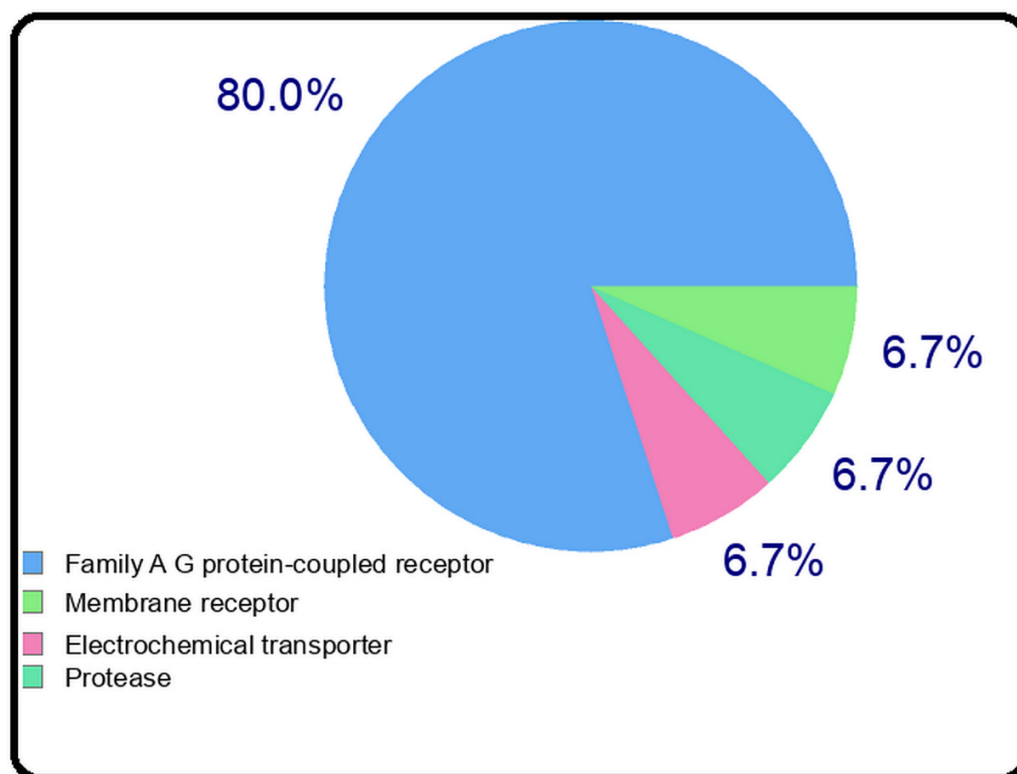

**Figure S3.** Mode of action of Lumateperone in human body.
