# Supplementary material for: Lumateperone Interact with S-Protein of Ebola Virus and TIM-1 of Human Cell Membrane: Insights from Computational Studies
Source: MDPI journal article supplement (doi:10.3390/app12178820), 2022-09-02
Supplement: s1 [file s1]

Archive with 1 entries (1 files):
- applsci-1785549-supplementary.pdf
